# Supplementary material
Source: publisher site journal article supplement (https://www.degruyterbrill.com/publication/isbn/9783110446067/downloadAsset/9783110446067__615_Historical_Perspective.pdf)
Supplement: Supplementary file 1 [file 9783110446067__615_Historical_Perspective.pdf]

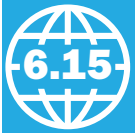

## Historical Perspective and Further Reading

There is a tremendous amount of history in multiprocessors; in this section we divide our discussion by both time period and architecture. We start with the SIMD approach and the Illiac IV. We then turn to a short discussion of some other early experimental multiprocessors and progress to a discussion of some of the great debates in parallel processing. Next we discuss the historical roots of the present **multiprocessors** and conclude by discussing recent advances.

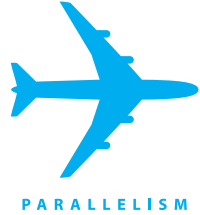

### SIMD Computers: Attractive Idea, Many Attempts, No Lasting Successes

*The cost of a general multiprocessor is, however, very high and further design options were considered which would decrease the cost without seriously degrading the power or efficiency of the system. The options consist of recentralizing one of the three major components. . . . Centralizing the [control unit] gives rise to the basic organization of [an] . . . array processor such as the Illiac IV.*

Bouknight et al. [1972]

The SIMD model was one of the earliest models of parallel computing, dating back to the first large-scale multiprocessor, the Illiac IV. The key idea in that multiprocessor, as in more recent SIMD multiprocessors, is to have a single instruction that operates on many data items at once, using many functional units (see [Figure e6.15.1](#)).

Although successful in pushing several technologies that proved useful in later projects, it failed as a computer. Costs escalated from the \$8 million estimate in 1966 to \$31 million by 1972, despite construction of only a quarter of the planned multiprocessor. Actual performance was at best 15 MFLOPS, versus initial predictions of 1000 MFLOPS for the full system [[Hord, 1982](#)]. Delivered to NASA Ames Research in 1972, the computer required three more years of engineering before it was usable.

These events slowed investigation of SIMD, with Danny Hillis [1985] resuscitating this style in the Connection Machine, which had 65,636 1-bit processors.

Real SIMD computers need to have a mixture of SISD and SIMD instructions. There is an SISD host computer to perform operations such as branches and address calculations that do not need parallel operation. The SIMD instructions are broadcast to all the execution units, each of which has its own set of registers. For flexibility, individual execution units can be disabled during an SIMD instruction. In addition, massively parallel SIMD multiprocessors rely on interconnection or communication networks to exchange data between processing elements.

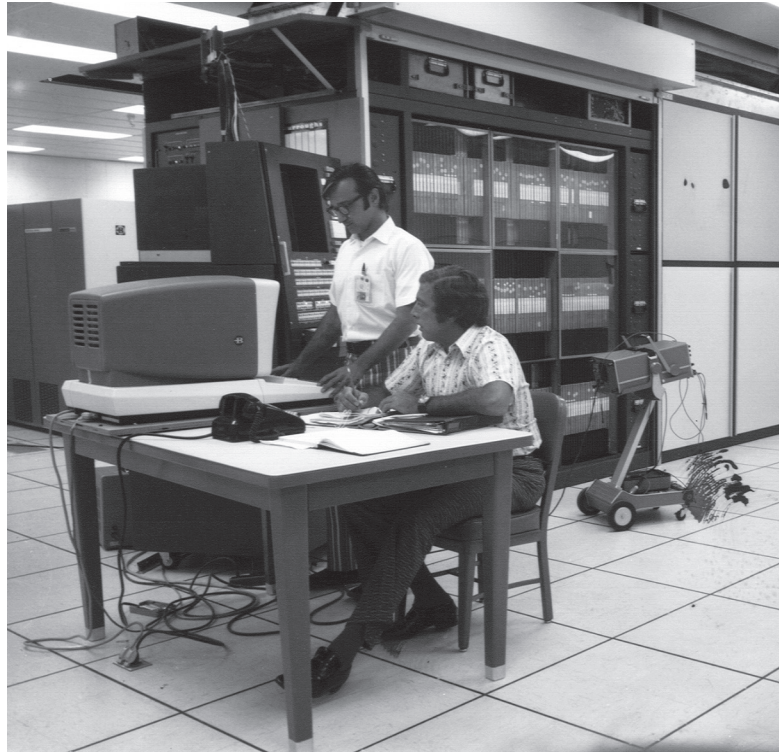

**FIGURE e6.15.1** The Illiac IV control unit followed by its 64 processing elements. It was perhaps the most infamous of supercomputers. The project started in 1965 and ran its first real application in 1976. The 64 processors used a 13-MHz clock, and their combined main memory size was 1 MB:  $64 \times 16$  KB. The Illiac IV was the first machine to teach us that software for parallel machines dominates hardware issues. Photo courtesy of NASA Ames Research Center.

SIMD works best in dealing with arrays in for loops. Hence, to have the opportunity for massive parallelism in SIMD, there must be massive amounts of data, or data parallelism. SIMD is at its weakest in case statements, in which each execution unit must perform a different operation on its data, depending on what data it has. The execution units with the wrong data are disabled so that the proper units can continue. Such situations essentially run at  $1/n$ th performance, where  $n$  is the number of cases.

The basic tradeoff in SIMD multiprocessors is performance of a processor versus number of processors. Recent multiprocessors emphasize a large degree of parallelism over performance of the individual processors. The Connection Multiprocessor 2, for example, offered 65,536 single-bit-wide processors, while the Illiac IV had 64 64-bit processors.

After being resurrected in the 1980s, first by Thinking Machines and then by MasPar, the SIMD model has once again been put to bed as a general-purpose multiprocessor architecture, for two main reasons. First, it is too inflexible. A number of important problems cannot use such a style of multiprocessor, and the architecture does not scale down in a competitive fashion; that is, small-scale SIMD multiprocessors often have worse cost performance than that of the alternatives. Second, SIMD cannot take advantage of the tremendous performance and cost advantages of microprocessor technology. Instead of leveraging this low-cost technology, designers of SIMD multiprocessors must build custom processors for their multiprocessors.

Although SIMD computers have departed from the scene as general-purpose alternatives, this style of architecture will continue to have a role in special-purpose designs. Many special-purpose tasks are highly data parallel and require a limited set of functional units. Thus, designers can build in support for certain operations, as well as hardwired interconnection paths among functional units. Such organizations are often called array processors, and they are useful for tasks like image and signal processing.

## Multimedia Extensions as SIMD Extensions to Instruction Sets

Many recent architectures have laid claim to being the first to offer multimedia extensions, in which a set of new instructions takes advantage of a single wide ALU that can be partitioned so that it will act as several narrower ALUs operating in parallel. It's unlikely that any appeared before 1957 however, when the Lincoln Lab's TX-2 computer offered instructions that operated on the ALU as either one 36-bit operation, two 18-bit operations, or four 9-bit operations. Ivan Sutherland, considered the Father of Computer Graphics, built his historic Sketchpad system on the TX-2. Sketchpad did in fact take advantage of these SIMD instructions, despite TX-2 appearing before invention of the term SIMD.

## Other Early Experiments

It is difficult to distinguish the first MIMD multiprocessor. Surprisingly, the first computer from the Eckert-Mauchly Corporation, for example, had duplicate units to improve **availability**.

Two of the best-documented multiprocessor projects were undertaken in the 1970s at Carnegie Mellon University. The first of these was C.mmp, which consisted of 16 PDP-11s connected by a crossbar switch to 16 memory units. It was among the first multiprocessors with more than a few processors, and it had a shared memory programming model. Much of the focus of the research in the C.mmp project was on software, especially in the OS area. A later multiprocessor, Cm\*, was

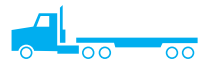

DEPENDABILITY

a cluster-based multiprocessor with a distributed memory and a nonuniform access time. The absence of caches and a long remote access latency made data placement critical. Many of the ideas in these multiprocessors would be reused in the 1980s, when the microprocessor made it much cheaper to build multiprocessors.

### Great Debates in Parallel Processing

*The turning away from the conventional organization came in the middle 1960s, when the law of diminishing returns began to take effect in the effort to increase the operational speed of a computer. . . . Electronic circuits are ultimately limited in their speed of operation by the speed of light . . . and many of the circuits were already operating in the nanosecond range.*

W. Jack Bouknight, et al.  
The Illiac IV System [1972]

*. . . sequential computers are approaching a fundamental physical limit on their potential computational power. Such a limit is the speed of light . . .*

Angel L. DeCegama  
The Technology of Parallel Processing, Volume I [1989]

*. . . today's multiprocessors . . . are nearing an impasse as technologies approach the speed of light. Even if the components of a sequential processor could be made to work this fast, the best that could be expected is no more than a few million instructions per second.*

David Mitchell  
The Transputer: The Time Is Now [1989]

The quotes above give the classic arguments for abandoning the current form of computing, and Amdahl [1967] gave the classic reply in support of continued focus on the IBM 360 architecture. Arguments for the advantages of parallel execution can be traced back to the 19th century [Menabrea, 1842]! Despite this, the effectiveness of the multiprocessor in reducing the latency of individual important programs is still being explored. Aside from these debates about the advantages and limitations of parallelism, several hot debates have focused on how to build multiprocessors.

From today's perspective, it is clear that the speed of light was not the brick wall; the brick wall was, instead, the power consumption of CMOS as the clock rates increased.

It's hard to predict the future, yet in 1989 Gordon Bell made two predictions for 1995. We included these predictions in the first edition of the book, when the outcome was completely unclear. We discuss them in this section, together with an assessment of the accuracy of the prediction.

The first was that a computer capable of sustaining a tera FLOPS—one million MFLOPS—would be constructed by 1995, using either a multicomputer with 4K to 32K nodes or a Connection Multiprocessor with several million processing elements.

To put this prediction in perspective, each year the Gordon Bell Prize acknowledges advances in parallelism, including the fastest real program (highest MFLOPS). In 1989 the winner used an eight-processor Cray Y-MP to run at 1680 MFLOPS. On the basis of these numbers, multiprocessors and programs would have to have improved by a factor of 3.6 each year for the fastest program to achieve 1 TFLOPS in 1995. In 1999, the first Gordon Bell prize winner crossed the 1 TFLOPS bar. Using a 5832-processor IBM RS/6000 SST system designed specially for Livermore Laboratories, they achieved 1.18 TFLOPS on a shock wave simulation. This ratio represents a year-to-year improvement of 1.93, which is still quite impressive.

What has been recognized since the 1990s is that although we may have the technology to build a TFLOPS multiprocessor, it is not clear that the machine is cost effective, except perhaps for a few very specialized and critically important applications related to national security. We estimated in 1990 that achieving 1 TFLOPS would require a machine with about 5000 processors and would cost about \$100 million. The 5832-processor IBM system at Livermore cost \$110 million. As might be expected, improvements in the performance of individual microprocessors both in cost and performance directly affect the cost and performance of large-scale multiprocessors, but a 5000-processor system will cost more than 5000 times the price of a desktop system using the same processor. Since that time, much faster multiprocessors have been built, but the major improvements have increasingly come from the processors in the past five years, rather than fundamental breakthroughs in parallel architecture.

The second Bell prediction concerned the number of data streams in supercomputers shipped in 1995. Danny Hillis believed that although supercomputers with a small number of data streams might be the best sellers, the biggest multiprocessors would be multiprocessors with many data streams, and these would perform the bulk of the computations. Bell bet Hillis that in the last quarter of calendar year 1995, more sustained MFLOPS would be shipped in multiprocessors using few data streams ( $<100$ ) rather than many data streams ( $>1000$ ). This bet concerned only supercomputers, defined as multiprocessors costing more than \$1 million and used for scientific applications. Sustained MFLOPS was defined for this bet as the number of floating-point operations per month, so availability of multiprocessors affects their rating.

In 1989, when this bet was made, it was totally unclear who would win. In 1995, a survey of the current publicly known supercomputers showed only six multiprocessors in existence in the world with more than 1000 data streams, so Bell's prediction was a clear winner. In fact, in 1995, much smaller microprocessor-based multiprocessors ( $<20$  processors) were becoming dominant.

In 1995, a survey of the 500 highest-performance multiprocessors in use (based on Linpack ratings), called the Top 500, showed that the largest number of multiprocessors were bus-based shared memory multiprocessors! By 2005,

various clusters or multicomputers played a large role. For example, in the top 25 systems, 11 were custom clusters, such as the IBM Blue Gene system or the Cray XT3, 10 were clusters of shared memory multiprocessors (both using distributed and centralized memory), and the remaining 4 were clusters built using PCs with an off-the-shelf interconnect.

## **More Recent Advances and Developments**

With the primary exception of the parallel vector multiprocessors and more recently of the IBM Blue Gene design, all other recent MIMD computers have been built from off-the-shelf microprocessors using a bus and logically central memory or an interconnection network and a distributed memory. A number of experimental multiprocessors built in the 1980s further refined and enhanced the concepts that form the basis for many of today's multiprocessors.

### **The Development of Bus-Based Coherent Multiprocessors**

Although very large mainframes were built with multiple processors in the 1960s and 1970s, multiprocessors did not become highly successful until the 1980s. Bell [1985] suggests the key was that the smaller size of the microprocessor allowed the memory bus to replace the interconnection network hardware and that portable operating systems meant that multiprocessor projects no longer required the invention of a new operating system. In this paper, Bell defined the terms multiprocessor and multicomputer and set the stage for two different approaches to building larger-scale multiprocessors. The first bus-based multiprocessor with snooping caches was the Synapse N + 1 in 1984.

The early 1990s saw the beginning of an expansion of such systems with the use of very wide, high-speed buses (the SGI Challenge system used a 256-bit, packet-oriented bus supporting up to 8 processor boards and 32 processors) and later the use of multiple buses and crossbar interconnects, for example, in the Sun SPARCCenter and Enterprise systems. In 2001, the Sun Enterprise servers represented the primary example of large-scale (>16 processors), symmetric multiprocessors in active use.

### **Toward Large-Scale Multiprocessors**

In the effort to build large-scale multiprocessors, two different directions were explored: message-passing multicomputers and scalable shared memory multiprocessors. Although there had been many attempts to build mesh and hypercube-connected multiprocessors, one of the first multiprocessors to successfully bring together all the pieces was the Cosmic Cube built at Caltech [Seitz, 1985]. It introduced important advances in routing and interconnect technology and substantially reduced the cost of the interconnect, which helped make the multicomputer viable.



The Intel iPSC 860, a hypercube-connected collection of i860s, was based on these ideas. More recent multiprocessors, such as the Intel Paragon, have used networks with lower dimensionality and higher individual links. The Paragon also employed a separate i860 as a communications controller in each node, although a number of users have found it better to use both i860 processors for computation as well as communication. The Thinking Multi processors CM-5 made use of off-the-shelf microprocessors. It provided user-level access to the communication channel, significantly improving communication latency. In 1995, these two multiprocessors represented the state of the art in message-passing multicomputers.

### Clusters

Clusters were probably “invented” in the 1960s by customers who could not fit all their work on one computer, or who needed a backup machine in case of failure of the primary machine [Pfister, 1998]. Tandem introduced a 16-node cluster in 1975. Digital followed with VAX clusters, introduced in 1984. They were originally independent computers that shared I/O devices, requiring a distributed operating system to coordinate activity. Soon they had communication links between computers, in part so that the computers could be geographically distributed to increase availability in case of a disaster at a single site. Users log on to the cluster and are unaware of which machine they are using. DEC (now HP) sold more than 25,000 clusters by 1993. Other early companies were Tandem (now HP) and IBM (still IBM). Today, virtually every company has cluster products. Most of these products are aimed at availability, with performance scaling as a secondary benefit.

Scientific computing on clusters emerged as a competitor to MPPs. In 1993, the Beowulf project started with the goal of fulfilling NASA's desire for a 1-GFLOPS computer for less than \$50,000. In 1994, a 16-node cluster built from off-the-shelf PCs using 80486s achieved that goal. This emphasis led to a variety of software interfaces to make it easier to submit, coordinate, and debug large programs or a large number of independent programs.

Efforts were made to reduce latency of communication in clusters as well as to increase bandwidth, and several research projects worked on that problem. (One commercial result of the low-latency research was the VI interface standard, which has been embraced by Infiniband, discussed below.) Low latency then proved useful in other applications. For example, in 1997 a cluster of 100 UltraSPARC desktop computers at U.C. Berkeley, connected by 160 MB/sec per link Myrinet switches, was used to set world records in database sort (sorting 8.6 GB of data originally on disk in 1 minute) and in cracking an encrypted message (taking just 3.5 hours to decipher a 40-bit DES key).

This research project, called Network of Workstations, also developed the Inktomi search engine, which led to a start-up company with the same name.

Google followed the example of Inktomi to build search engines from clusters of desktop computers rather than large-scale SMPs, which was the strategy of the leading search engine, Alta Vista, that Google took over. In 2013, virtually all Internet services rely on clusters to serve their millions of customers.

Clusters are also very popular with scientists. One reason is their low cost, which enables individual scientists or small groups to own a cluster dedicated to their programs. Such clusters can get results faster than waiting in the long job queues of the shared MPPs at supercomputer centers, which can stretch to weeks.

For those interested in learning more, Pfister [1998] has written an entertaining book on clusters.

### **Recent Trends in Large-Scale Multiprocessors**

In the mid-to-late 1990s, it became clear that the hoped-for growth in the market for ultralarge-scale parallel computing was unlikely to occur. Without this market growth, it became increasingly clear that the high-end parallel computing market was too small to support the costs of highly customized hardware and software designed for a small market. Perhaps the most important trend to come out of this observation was that clustering would be used to reach the highest levels of performance. There are now four general classes of large-scale multiprocessors:

1. Clusters that integrate standard desktop motherboards using interconnection technology, such as Myrinet or Infiniban
2. Multicomputers built from standard microprocessors configured into processing elements and connected with a custom interconnect, such as the IBM Blue Gene
3. Clusters of small-scale shared memory computers, possibly with vector support, including the Earth Simulator

The IBM Blue Gene is the most interesting of these designs, since its rationale parallels the underlying causes of the recent trend towards multicore in uniprocessor architectures. Blue Gene started as a research project within IBM aimed at the protein sequencing and folding problem. The Blue Gene designers observed that power was becoming an increasing concern in large-scale multiprocessors and that the performance/watt of processors from the embedded space was much better than those in the high-end uniprocessor space. If parallelism was the route to high performance, why not start with the most efficient building block and simply have more of them?

Thus, Blue Gene is constructed using a custom chip that includes an embedded PowerPC microprocessor offering half the performance of a high-end PowerPC, but at a much smaller fraction of the area and the power. This allows more system functions, including the global interconnect, to be integrated onto the same die.



The result is a highly replicable and efficient building block, allowing Blue Gene to reach much larger processor counts more efficiently. Instead of using stand-alone microprocessors or standard desktop boards as building blocks, Blue Gene uses processor cores. There is no doubt that such an approach provides much greater efficiency. Whether the market can support the cost of a customized design and special software remains an open question.

In 2006, a Blue Gene processor at Lawrence Livermore with 32K processors held a factor of 2.6 lead in Linpack performance over the third-place system, which consisted of 20 SGI Altix 512-processor systems interconnected with Infiniband as a cluster.

Blue Gene's predecessor was an experimental machine, QCDOC, which pioneered the concept of a machine using a lower-power embedded microprocessor and tightly integrated interconnect to drive down the cost and power consumption of a node.

## Looking Further

There is an almost unbounded amount of information on multiprocessors and multicomputers: conferences, journal papers, and even books seem to appear faster than any single person can absorb the ideas. No doubt many of these papers will go unnoticed—not unlike the past. Most of the major architecture conferences contain papers on multiprocessors. An annual conference, Supercomputing XY (where X and Y are the last two digits of the year), brings together users, architects, software developers, and vendors and publishes the proceedings in book, CD-ROM, and online (see [www.scXY.org](http://www.scXY.org)) form. Two major journals, *Journal of Parallel and Distributed Computing* and the *IEEE Transactions on Parallel and Distributed Systems*, contain papers on all aspects of parallel processing. Several books focusing on parallel processing are included in the following references, with Culler et al. [1998] being the most recent, large-scale effort. For years, Eugene Miya of NASA Ames has collected an online bibliography of parallel processing papers. The bibliography, which now contains more than 35,000 entries, is available online at [linwww.ira.uka.de/bibliography/Parallel/Eugene/index.html](http://linwww.ira.uka.de/bibliography/Parallel/Eugene/index.html).

[Asanovic, et al. \[2006\]](#) surveyed the wide-ranging challenges for the industry in this multicore challenge. That report may be a helpful in understanding the depth of the various challenges.

In addition to documenting the discovery of concepts now used in practice, these references also provide descriptions of many ideas that have been explored and found wanting, as well as ideas whose time has just not yet come. Given the move toward multicore and multiprocessors as the future of high-performance computer architecture, we expect that many new approaches will be explored in the years ahead. A few of them will manage to solve the hardware and software problems that have been the key to using multiprocessing for the past 40 years!

## Further Reading

Almasi, G. S. and A. Gottlieb [1989]. *Highly Parallel Computing*, Benjamin/Cummings, Redwood City, CA.

*A textbook covering parallel computers.*

Amdahl, G. M. [1967]. “Validity of the single processor approach to achieving large scale computing capabilities,” *Proc. AFIPS Spring Joint Computer Conf.*, Atlantic City, NJ (April), 483–85.

*Written in response to the claims of the Illiac IV, this three-page article describes Amdahl’s law and gives the classic reply to arguments for abandoning the current form of computing.*

Andrews, G. R. [1991]. *Concurrent Programming: Principles and Practice*, Benjamin/Cummings, Redwood City, CA.

*A text that gives the principles of parallel programming.*

Archibald, J. and J.-L. Baer [1986]. “Cache coherence protocols: Evaluation using a multiprocessor simulation model,” *ACM Trans. on Computer Systems* 4:4 (November), 273–98.

*Classic survey paper of shared-bus cache coherence protocols.*

Arpaci-Dusseau, A., R. Arpaci-Dusseau, D. Culler, J. Hellerstein, and D. Patterson [1997]. “High-performance sorting on networks of workstations,” *Proc. ACM SIG MOD/PODS Conference on Management of Data*, Tucson, AZ (May), 12–15.

*How a world record sort was performed on a cluster, including architecture critique of the workstation and network interface. By April 1, 1997, they pushed the record to 8.6 GB in 1 minute and 2.2 seconds to sort 100 MB.*

Asanovic, K., R. Bodik, B. C. Catanzaro, J. J. Gebis, P. Husbands, K. Keutzer, D. A. Patterson, W. L. Plishker, J. Shalf, S. W. Williams, and K. A. Yelick. [2006]. “The landscape of parallel computing research: A view from Berkeley.” Tech. Rep. UCB/EECS-2006-183, EECS Department, University of California, Berkeley (December 18).

*Nicknamed the “Berkeley View,” this report lays out the landscape of the multicore challenge.*

Bailey, D. H., E. Barszcz, J. T. Barton, D. S. Browning, R. L. Carter, L. Dagum, R. A. Fatoohi, P. O. Frederickson, T. A. Lasinski, R. S. Schreiber, H. D. Simon, V. Ven katakrishnan, and S. K. Weeratunga. [1991]. “The NAS parallel benchmarks—summary and preliminary results,” *Proceedings of the 1991 ACM/IEEE conference on Super-computing* (August).

*Describes the NAS parallel benchmarks.*

Bell, C. G. [1985]. “Multis: A new class of multiprocessor computers,” *Science* 228 (April 26), 462–67.

*Distinguishes shared address and nonshared address multiprocessors based on micro processors.*

Bienia, C., S. Kumar, J. P. Singh, and K. Li [2008]. “The PARSEC benchmark suite: characterization and architectural implications,” Princeton University Technical Report TR-81 1-008 (January).

*Describes the PARSEC parallel benchmarks. Also see <http://parsec.cs.princeton.edu/>.*

Bouknight, W. J., Denenberg, S. A., McIntyre, D. E., Randall, J. M., Sameh, A. H., & Slotnick, D. L. [1972]. The illiac iv system. *Proceedings of the IEEE*, 60(4), 369–388.

*It describes the most infamous SIMD supercomputer.*

Culler, D. E. and J. P. Singh, with A. Gupta [1998]. *Parallel Computer Architecture*, Morgan Kaufmann, San Francisco.

*A textbook on parallel computers.*

Bouknight, W. J., Denenberg, S. A., McIntyre, D. E., Randall, J. M., Sameh, A. H., & Slotnick, D. L. (1972). The illiac iv system. *Proceedings of the IEEE*, 60(4), 369-388.

*It describes the most infamous SIMD supercomputer.*

Dongarra J. J., J. R. Bunch, G. B. Moler, G. W. Stewart [1979]. *LINPACK Users' Guide*, Society for Industrial Mathematics.

*The original document describing Linpack, which became a widely used parallel benchmark.*

Falk, H. [1976]. "Reaching for the gigaflop," *IEEE Spectrum* 13:10 (October), 65-70.

*Chronicles the sad story of the Illiac IV: four times the cost and less than one-tenth the performance of original goals.*

Flynn, M. J. [1966]. "Very high-speed computing systems," *Proc. IEEE* 54:12 (December), 1901-09.

*Classic article showing SISD/SIMD/MISD/MIMD classifications.*

Hennessy, J. and D. Patterson [2003]. Chapters 6 and 8 in *Computer Architecture: A Quantitative Approach*, third edition, Morgan Kaufmann Publishers, San Francisco.

*A more in-depth coverage of a variety of multiprocessor and cluster topics, including programs and measurements.*

Henning, J. L. [2007]. "SPEC CPU suite growth: an historical perspective," *Computer Architecture News*, Vol. 35, no. 1 (March).

*Gives the history of SPEC, including the use of SPECrate to measure performance on independent jobs, which is being used as a parallel benchmark.*

Hillis, W. D. [1989]. *The connection machine*. The MIT Press.

*PhD Dissertation that makes case for 1-bit SIMD computer*

Hord, R. M. [1982]. *The Illiac-IV, the First Supercomputer*, Computer Science Press, Rockville, MD.

*A historical accounting of the Illiac IV project.*

Hwang, K. [1993]. *Advanced Computer Architecture with Parallel Programming*, McGraw-Hill, New York.

*Another textbook covering parallel computers.*

Kozyrakis, C. and D. Patterson [2003]. "Scalable vector processors for embedded systems," *IEEE Micro* 23:6 (November-December), 36-45.

*Examination of a vector architecture for the MIPS instruction set in media and signal processing.*

Menabrea, L. F. [1842]. "Sketch of the analytical engine invented by Charles Babbage," *Bibliothèque Universelle de Genève* (October).

*Certainly the earliest reference on multiprocessors, this mathematician made this comment while translating papers on Babbage's mechanical computer.*

Pfister, G. F. [1998]. *In Search of Clusters: The Coming Battle in Lowly Parallel Computing*, second edition, Prentice Hall, Upper Saddle River, NJ.

*An entertaining book that advocates clusters and is critical of NUMA multiprocessors.*

Regnier, G., Makineni, S., Illikkal, I., Iyer, R., Minturn, D., Huggahalli, R., and Foong, A. [2004]. TCP onloading for data center servers. *Computer*, 37(11), 48-58.

*A paper describing benefits of doing TCP/IP inside servers vs. external hardware.*

Seitz, C. [1985]. “The Cosmic Cube,” *Comm. ACM* 28:1 (January), 22–31.

*A tutorial article on a parallel processor connected via a hypertree. The Cosmic Cube is the ancestor of the Intel supercomputers.*

Slotnick, D. L. [1982]. “The conception and development of parallel processors—a personal memoir,” *Annals of the History of Computing* 4:1 (January), 20–30.

*Recollections of the beginnings of parallel processing by the architect of the Illiac IV.*

Williams, S., J. Carter, L. Oliker, J. Shalf, and K. Yelick [2008]. “Lattice Boltzmann simulation optimization on leading multicore platforms,” *International Parallel & Distributed Processing Symposium (IPDPS)*.

*Paper containing the results of the four multicores for LBMHD.*

Williams, S., L. Oliker, R. Vuduc, J. Shalf, K. Yelick, and J. Demmel [2007]. “Optimization of sparse matrix-vector multiplication on emerging multicore platforms,” *Supercomputing (SC)*.

*Paper containing the results of the four multicores for SPmV.*

Williams, S. [2008]. *Autotuning Performance of Multicore Computers*, Ph.D. Dissertation, U.C. Berkeley. *Dissertation containing the roofline model.*

Woo, S. C., M. Ohara, E. Torrie, J. P. Singh, and A. Gupta. “The SPLASH-2 programs: characterization and methodological considerations,” *Proceedings of the 22nd Annual International Symposium on Computer Architecture (ISCA '95)*, May, 24–36.

*Paper describing the second version of the Stanford parallel benchmarks.*
